# Supplementary material for: The Curious Anomaly of Skewed Judgment Distributions and Systematic Error in the Wisdom of Crowds
Source: PLoS One. 2014 Nov 18;9(11):e112386. doi: 10.1371/journal.pone.0112386 (PMC4236075; doi:10.1371/journal.pone.0112386)
Supplement: Data S6 — Judgment data in Excel about US unemployment, gathered from The Federal Reserve Bank of Philadelphia's Survey of Professional Forecasters. Judgments concern seasonally adjusted percentages of the workforce. Surveys are conducted quarterly by the bank. (XLS) [file pone.0112386.s008.xls]

## Sheet: unemployment_fed
Actual_value	Mean_of_expectations	Variance_of_expectations	Skew_of_expectations	Kurtosis_of_expectations	Number_of_judges_in_the_particular_survey	Aggregate_error	Average_individual_error_of_judges_in_survey	Extremity
5.6	5.61863	0.0156961	-0.410843	-0.00722097	51	-0.0186274	0.0970588	-0.402738
5.6	5.61765	0.0338824	-0.290274	0.340545	51	-0.0176471	0.139216	-0.402738
5.5	5.60196	0.0589961	-0.529286	0.939042	51	-0.101961	0.207843	-0.467809
5.6	5.60588	0.0773647	-0.196639	0.548365	51	-0.00588235	0.213725	-0.402738
5.1	5.6	0.1112	-0.501862	0.433849	51	-0.5	0.527451	-0.728091
5.6	5.73878	0.0103401	0.00841425	0.479113	49	-0.138776	0.146939	-0.402738
5.5	5.73469	0.0306463	0.145128	0.262586	49	-0.234694	0.246939	-0.467809
5.3	5.73617	0.0940981	-0.466389	0.146416	47	-0.43617	0.470213	-0.59795
5.6	5.72708	0.0496764	0.0528265	-0.817536	48	-0.127083	0.20625	-0.402738
5.1	5.7125	0.0768617	-0.303775	-0.67501	48	-0.6125	0.6125	-0.728091
5.3	5.42317	0.0100122	0.144974	0.236205	41	-0.123171	0.128049	-0.59795
5.3	5.42049	0.0259098	-0.121427	-0.54417	41	-0.120488	0.16439	-0.59795
4.8	5.44561	0.0525302	0.268752	0.695892	41	-0.64561	0.64561	-0.923303
4.6	4.77632	0.00672119	-0.146286	-0.456448	38	-0.176316	0.176316	-1.05344
4.3	4.76842	0.0287055	-0.564194	0.662273	38	-0.468421	0.468421	-1.24866
4.5	4.79737	0.0618848	-0.969038	1.58553	38	-0.297368	0.339474	-1.11851
4.4	4.81842	0.105327	-1.22066	2.45115	38	-0.418421	0.465789	-1.18359
4.4	4.88684	0.11739	-0.801135	0.247645	38	-0.486842	0.528947	-1.18359
4.5	5.21842	0.0950569	-0.363677	-0.366012	38	-0.718421	0.718421	-1.11851
4.6	5.55026	0.121134	0.394087	1.10691	39	-0.950256	0.950256	-1.05344
4.3	4.68125	0.00995968	0.816222	2.17804	32	-0.38125	0.38125	-1.24866
4.5	4.67812	0.0443448	-0.731235	2.34461	32	-0.178125	0.215625	-1.11851
4.4	4.70312	0.0770867	-1.11477	2.24493	32	-0.303125	0.353125	-1.18359
4.4	4.74375	0.116089	-1.1631	1.64723	32	-0.34375	0.4125	-1.18359
4.9	5.48625	0.0826907	0.206593	1.08602	40	-0.58625	0.58625	-0.858233
5.6	5.94643	0.0655423	0.00882297	-0.863789	28	-0.346429	0.360714	-0.402738
5.6	6.09655	0.00820197	-0.238742	0.478694	29	-0.496552	0.496552	-0.402738
5.4	6.03793	0.018867	-0.217543	-0.551553	29	-0.637931	0.637931	-0.53288
5.7	5.9931	0.0363793	0.636225	0.378017	29	-0.293103	0.293103	-0.337668
5.6	5.96207	0.0517241	0.291479	-0.129337	29	-0.362069	0.362069	-0.402738
5.5	5.60455	0.00742072	-1.00447	2.04238	44	-0.104545	0.113636	-0.467809
5.6	5.64773	0.0169715	0.0190221	-0.420514	44	-0.0477273	0.106818	-0.402738
5.1	5.65	0.0397674	0.129031	0.138067	44	-0.55	0.55	-0.728091
5.3	5.65682	0.0611152	-0.201596	0.635778	44	-0.356818	0.379545	-0.59795
5.3	5.66136	0.0991702	0.0185755	1.318	44	-0.361364	0.402273	-0.59795
5.3	5.23611	0.00980159	0.503183	1.81691	36	0.0638889	0.0861111	-0.59795
4.8	5.275	0.0247857	-0.0726816	-0.299685	36	-0.475	0.475	-0.923303
4.9	5.31389	0.0475159	-0.380841	-0.114228	36	-0.413889	0.413889	-0.858233
4.6	5.35833	0.0973571	0.0592959	0.703309	36	-0.758333	0.758333	-1.05344
4.6	5.40278	0.132278	0.357432	1.64721	36	-0.802778	0.802778	-1.05344
4.8	5.75469	0.0953805	0.253233	1.42972	32	-0.954687	0.954687	-0.923303
4.9	5.04	0.0142564	0.962783	1.26414	40	-0.14	0.145	-0.858233
4.6	5.0475	0.0292244	0.174494	-0.803492	40	-0.4475	0.4475	-1.05344
4.6	5.0775	0.0520449	0.155634	-0.342653	40	-0.4775	0.4775	-1.05344
4.3	5.1575	0.0809679	-0.275673	-0.393391	40	-0.8575	0.8575	-1.24866
4.1	4.57097	0.152129	-0.969678	1.46953	31	-0.470968	0.535484	-1.3788
4.2	4.3697	0.00780303	0.367662	0.362351	33	-0.169697	0.169697	-1.31373
4.2	4.38788	0.0329735	-0.242082	-0.752572	33	-0.187879	0.212121	-1.31373
4.1	4.4303	0.063428	-0.577755	-0.347366	33	-0.330303	0.354545	-1.3788
4.1	4.48485	0.104451	-0.753827	0.235878	33	-0.384848	0.433333	-1.3788
5.6	5.75167	0.0115286	-0.0550296	0.126569	36	-0.151667	0.159444	-0.402738
5.1	5.77056	0.0341825	0.272965	-0.563048	36	-0.670556	0.670556	-0.728091
5.3	5.78056	0.0553254	0.177191	-0.582286	36	-0.480556	0.480556	-0.59795
5.3	5.77083	0.0883393	0.250956	0.259616	36	-0.470833	0.481944	-0.59795
5.4	5.84074	0.00558405	0.341381	0.0716326	27	-0.440741	0.440741	-0.53288
5.7	5.8	0.0184615	0.298072	-0.479375	27	-0.1	0.12963	-0.337668
5.6	5.76296	0.0324217	0.434282	0.107828	27	-0.162963	0.192593	-0.402738
5.6	5.75185	0.047208	0.28877	0.00825839	27	-0.151852	0.211111	-0.402738
5.5	5.74074	0.0494302	0.280064	0.220915	27	-0.240741	0.27037	-0.467809
4.1	4.14286	0.00299652	0.764708	-0.513417	42	-0.0428571	0.0428571	-1.3788
4.1	4.20476	0.0155865	-0.0938861	-0.251572	42	-0.104762	0.138095	-1.3788
4.1	4.21667	0.0341057	-0.0858373	-0.611655	42	-0.116667	0.178571	-1.3788
4	4.25952	0.0444193	-0.0904662	-0.239846	42	-0.259524	0.283333	-1.44387
4.2	4.30119	0.0603034	-0.0578571	-0.274768	42	-0.10119	0.203571	-1.31373
4.2	4.76429	0.122381	-0.913658	0.197792	28	-0.564286	0.6	-1.31373
5.6	5.5	0.0765217	0.67221	0.854138	24	0.1	0.225	-0.402738
5.1	5.5325	0.00635256	0.611503	0.159382	40	-0.4325	0.4325	-0.728091
5.3	5.535	0.0177179	-0.209089	-0.614056	40	-0.235	0.235	-0.59795
5.3	5.56	0.0398974	-0.266612	-0.754615	40	-0.26	0.28	-0.59795
4.8	5.59	0.0552821	0.200841	-0.378191	40	-0.79	0.79	-0.923303
4.9	5.6325	0.0868654	0.359836	0.65337	40	-0.7325	0.7325	-0.858233
5.7	5.53448	0.0116256	-0.393644	-0.00651071	29	0.165517	0.165517	-0.337668
5.6	5.46552	0.0409113	0.397233	0.166859	29	0.134483	0.196552	-0.402738
5.6	5.45862	0.0496552	0.875886	0.653587	29	0.141379	0.224138	-0.402738
5.5	5.47931	0.0552709	0.975119	0.62175	29	0.0206897	0.186207	-0.467809
4.3	5.38	0.0845882	-0.337484	-0.855804	35	-1.08	1.08	-1.24866
4.4	4.59091	0.00647727	0.553755	2.0099	33	-0.190909	0.190909	-1.18359
4.2	4.66061	0.0274621	0.240301	-0.112898	33	-0.460606	0.460606	-1.31373
4.2	4.7203	0.0461655	0.0426458	0.103995	33	-0.520303	0.520303	-1.31373
4.1	4.80394	0.0632621	-0.347616	0.731141	33	-0.703939	0.703939	-1.3788
4.1	4.88788	0.0948485	-0.808078	0.93336	33	-0.787879	0.793939	-1.3788
4.2	4.28243	0.00753003	-0.972405	2.04649	37	-0.0824324	0.0986486	-1.31373
4.1	4.27838	0.0206306	-0.787336	0.143908	37	-0.178378	0.2	-1.3788
4.1	4.3027	0.0469369	-1.02429	0.598024	37	-0.202703	0.267568	-1.3788
4.1	4.37027	0.0777027	-1.26971	1.5362	37	-0.27027	0.351351	-1.3788
4.1	4.44054	0.134144	-0.95319	1.41316	37	-0.340541	0.437838	-1.3788
4.4	4.48937	0.00890282	-0.323944	0.272998	32	-0.089375	0.110625	-1.18359
4.4	4.49719	0.0292209	-0.15303	0.543174	32	-0.0971875	0.159062	-1.18359
4.2	4.53406	0.054741	-0.797736	0.677292	32	-0.334062	0.359063	-1.31373
4.2	4.58063	0.0948512	-1.16213	1.08484	32	-0.380625	0.443125	-1.31373
4.1	4.60844	0.127956	-1.23917	1.74846	32	-0.508437	0.558438	-1.3788
4.8	5.32368	0.00564011	-0.830607	0.691766	38	-0.523684	0.523684	-0.923303
4.9	5.30526	0.0221337	0.425068	0.155616	38	-0.405263	0.405263	-0.858233
4.6	5.32368	0.0521266	0.0226697	-0.689194	38	-0.723684	0.723684	-1.05344
4.6	5.35	0.0863514	-0.5093	0.673456	38	-0.75	0.755263	-1.05344
4.6	4.86556	0.0144825	0.946085	2.48928	36	-0.265556	0.265556	-1.05344
4.6	4.88611	0.0355159	-0.194848	0.152191	36	-0.286111	0.302778	-1.05344
4.3	4.89306	0.0523075	-0.69218	0.368967	36	-0.593056	0.593056	-1.24866
4.5	4.96028	0.0737171	-0.960743	1.40487	36	-0.460278	0.4825	-1.11851
4.4	4.99971	0.0857087	-1.17123	2.6755	35	-0.599714	0.622571	-1.18359
4.1	4.28649	0.00453453	0.741388	1.73925	37	-0.186486	0.186486	-1.3788
4.1	4.3	0.0166667	0.491316	1.69513	37	-0.2	0.205405	-1.3788
4.1	4.35676	0.0380781	1.17306	5.14932	37	-0.256757	0.267568	-1.3788
4.1	4.39054	0.0635886	0.497878	2.02779	37	-0.290541	0.317568	-1.3788
4	4.45541	0.0821922	0.197848	0.0823684	37	-0.455405	0.466216	-1.44387
4.5	4.52414	0.0283251	-0.650492	2.20616	29	-0.0241379	0.113793	-1.11851
4.4	4.56207	0.0495813	-1.40178	3.539	29	-0.162069	0.224138	-1.18359
4.4	4.58276	0.108621	-1.38608	2.6979	29	-0.182759	0.32069	-1.18359
4.2	4.60345	0.123202	-0.946208	0.228585	29	-0.403448	0.472414	-1.31373
4.2	4.65862	0.148941	-0.918442	-0.0952283	29	-0.458621	0.534483	-1.31373
6.5	6.70588	0.00481283	-0.0780786	-0.804301	34	-0.205882	0.205882	0.182897
6.1	6.44412	0.00738859	0.497311	1.22977	34	-0.344118	0.344118	-0.0773855
5.6	6.34412	0.0231462	-0.210419	-0.0559627	34	-0.744118	0.744118	-0.402738
5.4	6.23235	0.0246791	0.222587	-0.578933	34	-0.832353	0.832353	-0.53288
5.6	6.11875	0.0338306	0.402545	-0.791638	32	-0.51875	0.51875	-0.402738
6	6.61818	0.0690341	-0.166336	-0.452008	33	-0.618182	0.618182	-0.142456
6.1	6.52121	0.0942235	0.11135	-1.00692	33	-0.421212	0.427273	-0.0773855
6.7	6.95833	0.0065	-1.15215	2.09971	36	-0.258333	0.258333	0.313038
6.5	6.84444	0.0236825	-0.462173	-0.049937	36	-0.344444	0.344444	0.182897
6.5	6.725	0.0385	-0.418986	0.182184	36	-0.225	0.252778	0.182897
4.1	4.025	0.00935714	1.26588	2.1754	36	0.075	0.102778	-1.3788
4.1	4.025	0.0270714	0.919448	1.21383	36	0.075	0.147222	-1.3788
4	4.075	0.0396429	1.19437	1.78465	36	-0.075	0.141667	-1.44387
4.2	4.11667	0.0522857	-0.110492	-0.234889	36	0.0833333	0.183333	-1.31373
6	6.63125	0.0215726	0.459667	-0.0695312	32	-0.63125	0.63125	-0.142456
6.1	6.5375	0.0333871	-0.0571076	-0.576701	32	-0.4375	0.4375	-0.0773855
5.6	6.45937	0.0457157	0.0206469	0.17713	32	-0.859375	0.859375	-0.402738
5.4	6.39375	0.0606048	-0.241616	0.218387	32	-0.99375	0.99375	-0.53288
5.7	6.15152	0.0275758	0.538407	-0.539402	33	-0.451515	0.451515	-0.337668
4.4	4.2	0.0625806	-0.514307	-0.132504	32	0.2	0.24375	-1.18359
5.7	6.30185	0.0443234	-0.0646681	0.739293	27	-0.601852	0.601852	-0.337668
4.9	4.1125	0.0624194	-0.654479	0.485082	32	0.7875	0.7875	-0.858233
4.1	3.94412	0.00375223	0.237024	-0.126454	34	0.155882	0.155882	-1.3788
4	3.95588	0.0104189	0.10371	-0.29274	34	0.0441176	0.0794118	-1.44387
4.2	4.00294	0.0227184	0.172859	-0.247547	34	0.197059	0.214706	-1.31373
4.4	4.06176	0.0333422	0.101065	0.627198	34	0.338235	0.344118	-1.18359
6	6.66964	0.010248	-0.697524	0.534069	28	-0.669643	0.669643	-0.142456
6.1	6.53929	0.0276587	0.0458549	-0.165996	28	-0.439286	0.439286	-0.0773855
5.6	6.43214	0.0355952	0.851664	1.80166	28	-0.832143	0.832143	-0.402738
5.4	6.35	0.0440741	0.879379	2.39408	28	-0.95	0.95	-0.53288
7	7.45897	0.00879892	-0.274074	0.240831	39	-0.458974	0.458974	0.50825
6.9	7.34615	0.0278138	-2.08205	4.76325	39	-0.446154	0.45641	0.443179
6.7	7.21795	0.0467746	-1.57645	4.58201	39	-0.517949	0.533333	0.313038
6.5	7.08462	0.0765992	-1.32347	5.15017	39	-0.584615	0.610256	0.182897
6.5	6.94359	0.0862078	-0.263685	2.15541	39	-0.44359	0.469231	0.182897
6.5	6.90286	0.0067563	0.619577	0.223672	35	-0.402857	0.402857	0.182897
6.5	6.80714	0.0191387	0.222891	1.06241	35	-0.307143	0.307143	0.182897
7.3	7.59167	0.0219286	-0.799255	0.344627	36	-0.291667	0.297222	0.703461
7	7.43056	0.0433254	-0.734757	0.868851	36	-0.430556	0.441667	0.50825
6.9	7.26944	0.0753254	-1.53109	5.26377	36	-0.369444	0.408333	0.443179
6.7	7.11389	0.0766587	-0.768093	1.98011	36	-0.413889	0.441667	0.313038
6.5	6.95833	0.0910714	-0.460061	1.81502	36	-0.458333	0.486111	0.182897
6.9	6.372	0.0189694	1.85201	3.87109	35	0.528	0.528	0.443179
6.8	6.69486	0.0463375	0.390294	-0.105832	35	0.105143	0.190857	0.378109
6.9	6.83771	0.0857829	-0.837798	0.780289	35	0.0622857	0.223429	0.443179
7.3	6.80171	0.125985	-0.519988	0.255898	35	0.498286	0.513143	0.703461
6	6.73529	0.0320499	0.373268	0.558791	34	-0.735294	0.735294	-0.142456
6.1	6.62353	0.0527629	0.538356	1.70423	34	-0.523529	0.523529	-0.0773855
7.5	6.692	0.165644	-0.175478	0.420352	30	0.808	0.814667	0.833603
5.6	6.55312	0.0741835	0.173174	1.17069	32	-0.953125	0.953125	-0.402738
6.9	6.66286	0.134168	0.612595	-0.143676	35	0.237143	0.38	0.443179
7.5	7.1	0.00820513	-1.08944	1.90787	40	0.4	0.4	0.833603
7.6	7.05625	0.0383574	-0.465035	0.603315	40	0.54375	0.54375	0.898673
7.3	6.9225	0.0848654	-0.300077	1.76768	40	0.3775	0.4075	0.703461
7	6.7825	0.113276	0.410011	0.270341	40	0.2175	0.3425	0.50825
7.6	7.17568	0.0191141	-3.33648	15.9774	37	0.424324	0.424324	0.898673
7.3	7.05405	0.0358859	-0.377274	1.32827	37	0.245946	0.262162	0.703461
7	6.9027	0.0552703	0.5353	1.22419	37	0.0972973	0.189189	0.50825
7.3	6.4375	0.202419	0.829842	1.69505	32	0.8625	0.89375	0.703461
6.9	6.87667	0.0117792	-0.118097	-0.080742	33	0.0233333	0.09	0.443179
7.3	6.81121	0.0473985	0.177009	0.536278	33	0.488788	0.488788	0.703461
7.5	6.67727	0.097358	0.231806	0.997656	33	0.822727	0.822727	0.833603
7.6	6.54121	0.153673	0.65101	1.34373	33	1.05879	1.06485	0.898673
7.3	6.84359	0.00568151	-0.93678	1.73139	39	0.45641	0.45641	0.703461
7.5	6.8359	0.0244669	-0.376384	-0.265971	39	0.664103	0.664103	0.833603
7.6	6.75385	0.0488664	-0.439233	1.71826	39	0.846154	0.846154	0.898673
7.3	6.63846	0.067166	-0.429795	0.956545	39	0.661538	0.661538	0.703461
7	6.53333	0.0775439	-0.302017	0.294413	39	0.466667	0.466667	0.50825
6.9	6.76857	0.0757479	0.590909	1.32053	35	0.131429	0.234286	0.443179
6.7	6.63143	0.106336	0.744004	1.09903	35	0.0685714	0.257143	0.313038
4	4.00645	0.00595699	0.351291	-0.067917	31	-0.00645161	0.0516129	-1.44387
4.2	4.06258	0.0134065	0.750107	-0.264864	31	0.137419	0.156774	-1.31373
4.4	4.12839	0.024314	-0.174393	-0.420434	31	0.271613	0.271613	-1.18359
4.9	4.17903	0.048629	0.278043	1.12067	31	0.720968	0.720968	-0.858233
4.2	4.01853	0.00773414	1.07895	2.15568	34	0.181471	0.187353	-1.31373
4.4	4.09912	0.013784	0.0108847	-0.591131	34	0.300882	0.300882	-1.18359
4.9	4.17441	0.0263224	1.52502	5.76096	34	0.725588	0.725588	-0.858233
5.6	4.21676	0.0559195	2.9568	13.1674	34	1.38324	1.38324	-0.402738
5.5	4.27324	0.0929013	3.14943	14.5577	34	1.22676	1.23853	-0.467809
5.6	4.24967	0.0771757	1.10893	3.72197	30	1.35033	1.35033	-0.402738
6.9	7.14545	0.0113068	-0.703842	2.91889	33	-0.245455	0.251515	0.443179
6.7	7.01818	0.0334091	-1.16858	2.98878	33	-0.318182	0.336364	0.313038
6.5	6.89394	0.0555871	-1.68961	5.61446	33	-0.393939	0.424242	0.182897
6.5	6.7697	0.060928	-0.809214	2.20021	33	-0.269697	0.318182	0.182897
6.8	6.80071	0.0278263	0.218385	0.110742	42	-0.000714284	0.119762	0.378109
6.9	6.93238	0.0724283	-0.371399	-0.565081	42	-0.032381	0.218095	0.443179
7.3	6.8369	0.107202	0.188529	0.332787	42	0.463095	0.491667	0.703461
7.5	6.6941	0.133672	0.918239	3.07369	39	0.805897	0.831538	0.833603
7.6	6.54692	0.158817	1.2773	5.02296	39	1.05308	1.07872	0.898673
6	6.64333	0.0797816	-0.672551	0.334962	30	-0.643333	0.65	-0.142456
4.4	4.24714	0.0107269	0.207129	-0.149157	35	0.152857	0.158571	-1.18359
4.9	4.43286	0.0686681	2.02611	7.13491	35	0.467143	0.501429	-0.858233
5.6	4.50714	0.0767857	0.216859	-0.583759	35	1.09286	1.09286	-0.402738
5.5	4.53571	0.0984664	0.276204	-0.335825	35	0.964286	0.964286	-0.467809
5.8	4.54559	0.140965	0.454704	-0.573901	34	1.25441	1.25441	-0.272597
5.6	4.66061	0.00996212	-0.11066	0.849335	33	0.939394	0.939394	-0.402738
5.5	4.84848	0.0263258	-0.905721	1.61941	33	0.651515	0.651515	-0.467809
5.8	4.91212	0.0679735	-0.36633	0.950849	33	0.887879	0.887879	-0.272597
5.7	4.91818	0.107159	0.271943	1.07641	33	0.781818	0.781818	-0.337668
5.9	4.90303	0.140303	0.236857	0.609474	33	0.99697	0.99697	-0.207527
4.9	4.49394	0.0162121	0.216589	-0.289276	33	0.406061	0.406061	-0.858233
5.6	4.68788	0.0548485	1.49138	3.56414	33	0.912121	0.912121	-0.402738
5.5	4.77273	0.0782955	0.726818	0.492152	33	0.727273	0.727273	-0.467809
5.8	4.81818	0.103409	0.341435	-0.267581	33	0.981818	0.981818	-0.272597
5.7	4.81515	0.150076	0.070146	0.0721882	33	0.884848	0.884848	-0.337668
5.8	5.82059	0.00835116	0.0709469	0.279417	34	-0.0205882	0.0617647	-0.272597
6.1	5.89118	0.0474955	-0.608073	-0.320744	34	0.208824	0.232353	-0.0773855
6.1	5.80294	0.0730214	-0.38551	0.128697	34	0.297059	0.320588	-0.0773855
5.9	5.66765	0.0901337	-0.79618	2.1154	34	0.232353	0.291176	-0.207527
5.6	5.52941	0.11426	-1.26008	4.59717	34	0.0705882	0.229412	-0.402738
6.5	5.86	0.0162759	0.828442	0.640606	30	0.64	0.64	0.182897
6.9	6.2	0.057931	-0.0794913	-0.925626	30	0.7	0.7	0.443179
6.8	6.44667	0.139126	0.0669931	-1.11911	30	0.353333	0.406667	0.378109
6.9	6.54667	0.220506	0.12763	-0.932113	30	0.353333	0.453333	0.443179
7.3	6.52333	0.259092	0.0999175	-1.05746	30	0.776667	0.79	0.703461
5.9	5.96	0.00894118	0.247943	0.0816073	35	-0.06	0.0828571	-0.207527
5.8	5.96571	0.0334958	-0.343218	0.33387	35	-0.165714	0.205714	-0.272597
6.1	5.86	0.0601176	-0.229574	0.836208	35	0.24	0.28	-0.0773855
6.1	5.72857	0.087395	-0.325402	0.975284	35	0.371429	0.394286	-0.0773855
5.5	5.54483	0.0397044	-1.60547	2.37587	29	-0.0448276	0.155172	-0.467809
5.8	5.8931	0.0992365	-0.469356	1.06522	29	-0.0931034	0.224138	-0.272597
5.7	6.01379	0.114089	-0.593539	0.742548	29	-0.313793	0.382759	-0.337668
5.9	5.62059	0.108351	-0.745795	1.83808	34	0.279412	0.332353	-0.207527
5.9	6.00714	0.140688	-0.332127	0.150613	28	-0.107143	0.314286	-0.207527
5.8	5.87857	0.15582	0.0393842	-0.209305	28	-0.0785714	0.328571	-0.272597
5.7	5.88194	0.0283075	-0.373152	-0.662779	36	-0.181944	0.209722	-0.337668
5.9	5.84306	0.0513075	-0.706603	-0.0134767	36	0.0569444	0.165278	-0.207527
5.8	5.73611	0.066373	-0.425236	-0.582272	36	0.0638889	0.213889	-0.272597
6.1	5.62457	0.0924255	-0.288585	-0.670643	35	0.475429	0.481143	-0.0773855
6.1	5.496	0.113031	-0.451211	-0.662357	35	0.604	0.604	-0.0773855
6.1	5.96216	0.0235285	0.147706	-1.08579	37	0.137838	0.17027	-0.0773855
6.1	6	0.0488889	0	-1.18005	37	0.1	0.202703	-0.0773855
5.9	5.90811	0.0735435	0.0597484	-0.462957	37	-0.00810811	0.218919	-0.207527
5.6	5.75676	0.0864114	-0.221317	0.808377	37	-0.156757	0.254054	-0.402738
5.6	5.64595	0.101997	-0.779512	3.57267	37	-0.0459459	0.224324	-0.402738
5.8	5.82647	0.0213993	1.05209	2.00014	34	-0.0264706	0.108824	-0.272597
5.7	5.98235	0.0493761	-0.080847	-0.188904	34	-0.282353	0.3	-0.337668
5.9	5.94412	0.100116	-0.639503	0.0331725	34	-0.0441176	0.267647	-0.207527
5.8	5.80882	0.135374	-0.698952	0.672962	34	-0.00882353	0.297059	-0.272597
6.1	5.68485	0.157576	-0.700776	1.09294	33	0.415152	0.445455	-0.0773855
5.4	5.69697	0.078428	-0.494035	0.576728	33	-0.29697	0.351515	-0.53288
5.9	6.2187	0.0144424	2.14189	8.55249	30	-0.3187	0.3187	-0.207527
5.6	6.13	0.0435517	0.668769	0.784705	30	-0.53	0.53	-0.402738
5.6	6.02667	0.0682299	0.582804	-0.115712	30	-0.426667	0.426667	-0.402738
5.4	5.93333	0.0891954	0.377551	-0.380137	30	-0.533333	0.533333	-0.53288
5.4	5.83333	0.107816	0.0461509	-0.219356	30	-0.433333	0.453333	-0.53288
6.1	6.00294	0.00999109	-1.02878	1.97183	34	0.0970588	0.102941	-0.0773855
5.9	5.99118	0.0274955	-0.317492	-0.24056	34	-0.0911765	0.15	-0.207527
5.6	5.9	0.0454545	-0.0598028	-0.305871	34	-0.3	0.311765	-0.402738
5.6	5.80294	0.0584759	-0.132125	0.196567	34	-0.202941	0.25	-0.402738
5.9	5.47692	0.0135897	0.152288	-0.193365	13	0.423077	0.423077	-0.207527
6.5	5.64615	0.0410256	0.670296	0.628072	13	0.853846	0.853846	0.182897
6.9	5.77692	0.0835897	0.0758116	-1.48417	13	1.12308	1.12308	0.443179
6.8	5.85385	0.174359	0.831889	0.475327	13	0.946154	0.946154	0.378109
5.1	5.36516	0.109412	-0.934005	5.40894	31	-0.265161	0.349032	-0.728091
6.9	5.85	0.168182	0.308429	-0.998405	12	1.05	1.05	0.443179
5.4	5.60334	0.00590572	-0.153556	1.39124	32	-0.203344	0.203344	-0.53288
5.4	5.50481	0.0143687	-0.0515193	1.36453	32	-0.104813	0.129812	-0.53288
5.4	5.41162	0.0247481	-0.733373	1.12446	32	-0.011625	0.107438	-0.53288
4.9	5.27627	0.062389	-0.864934	2.32395	30	-0.376267	0.4096	-0.858233
5.6	5.7075	0.0141871	0.451127	-0.0476856	32	-0.1075	0.12	-0.402738
5.4	5.62312	0.0282867	0.0692752	1.48126	32	-0.223125	0.241875	-0.53288
5.4	5.53594	0.0494959	-0.526908	3.98497	32	-0.135937	0.197813	-0.53288
5.4	5.4425	0.0829935	-0.672208	3.54681	32	-0.0425	0.204375	-0.53288
5.6	6.03206	0.0120956	0.150769	0.0233144	34	-0.432059	0.432059	-0.402738
5.6	5.95324	0.0271438	0.435548	1.89445	34	-0.353235	0.358529	-0.402738
5.4	5.84912	0.0551174	0.0972324	0.264114	34	-0.449118	0.456765	-0.53288
5.4	5.72529	0.0672075	-0.402832	0.254195	34	-0.325294	0.357059	-0.53288
5.4	5.60529	0.0917408	-0.443013	-0.275892	34	-0.205294	0.306471	-0.53288
5.1	5.33519	0.0412502	-0.791424	0.825506	31	-0.235194	0.273903	-0.728091
5.4	5.412	0.00821115	0.00714173	1.24208	34	-0.012	0.0561765	-0.53288
5.1	5.3545	0.0197527	0.714617	0.963267	34	-0.2545	0.2545	-0.728091
4.9	5.27994	0.0311565	0.257989	0.407373	34	-0.379941	0.379941	-0.858233
5	5.23503	0.038776	-0.35002	0.934301	34	-0.235029	0.263853	-0.793162
4.8	5.18012	0.0554753	-0.789223	1.25516	34	-0.380118	0.407176	-0.923303
5.1	5.28825	0.00631214	0.262407	0.657785	36	-0.18825	0.18825	-0.728091
4.9	5.23258	0.0113133	0.244429	0.27104	36	-0.332583	0.332583	-0.858233
5	5.18883	0.0204729	-0.187267	0.537458	36	-0.188833	0.2005	-0.793162
4.8	5.13692	0.0301251	-0.678239	1.32291	36	-0.336917	0.346361	-0.923303
4.6	5.07777	0.0394609	-0.666646	1.01275	35	-0.477771	0.482914	-1.05344
5.4	5.5072	0.00878037	-0.664694	1.52807	30	-0.1072	0.123867	-0.53288
5.4	5.41633	0.0250264	-1.34244	1.56048	30	-0.0163333	0.119667	-0.53288
5.1	5.34177	0.0341389	-0.117507	-0.0145798	30	-0.241767	0.261767	-0.728091
4.9	5.26837	0.0466439	-1.10212	2.3468	30	-0.368367	0.395033	-0.858233
5	5.21233	0.0612447	-1.00029	2.07322	30	-0.212333	0.272333	-0.793162
4.6	5.09809	0.0330437	-0.321508	0.301925	44	-0.498091	0.498091	-1.05344
4.7	5.07439	0.0407042	-0.483225	0.670827	44	-0.374386	0.383477	-0.988374
5.1	5.4	0.00428571	0	-0.179487	15	-0.3	0.3	-0.728091
5.2	5.41333	0.038381	0.969723	0.177593	15	-0.213333	0.213333	-0.663021
5.2	5.46667	0.0809524	0.496985	0.20905	15	-0.266667	0.306667	-0.663021
5.3	5.48	0.0845714	-0.414997	0.200104	15	-0.18	0.273333	-0.59795
5.3	5.56	0.0954286	0.199283	0.0263545	15	-0.26	0.313333	-0.59795
5.8	5.68116	0.0218457	-1.74755	5.68974	69	0.118841	0.127536	-0.272597
6.2	5.7058	0.0849659	-0.620366	0.0931238	69	0.494203	0.497101	-0.0123149
6.1	5.5942	0.172907	-0.065195	-0.379521	69	0.505797	0.549275	-0.0773855
6	5.52319	0.21916	0.0918763	-0.562131	69	0.476812	0.543478	-0.142456
5.7	5.36522	0.253478	0.00729809	-0.695919	69	0.334783	0.476812	-0.337668
4.9	5.20002	0.00802571	0.81957	2.02157	46	-0.300022	0.300022	-0.858233
5	5.1642	0.0143666	-0.193803	-0.0924018	46	-0.164196	0.173326	-0.793162
4.8	5.12089	0.0228432	-0.0349977	0.0415332	46	-0.320891	0.320891	-0.923303
5.3	5.42857	0.00835165	0.0431938	-0.65311	14	-0.128571	0.128571	-0.59795
5.6	5.52857	0.0268132	-0.0450514	-1.02631	14	0.0714286	0.142857	-0.402738
5.9	5.53571	0.0470879	0.0946405	-1.05626	14	0.364286	0.364286	-0.207527
6.5	5.52857	0.0498901	0.065085	-1.00445	14	0.971429	0.971429	0.182897
6.9	5.58571	0.0397802	0.0249305	-0.230043	14	1.31429	1.31429	0.443179
5.6	5.37778	0.0169444	2.26868	5.657	9	0.222222	0.244444	-0.402738
5.9	5.42222	0.0319444	0.756198	-0.620254	9	0.477778	0.477778	-0.207527
6.5	5.47778	0.0544444	0.950541	-0.000267754	9	1.02222	1.02222	0.182897
6.9	5.5	0.0625	0.925714	0.626286	9	1.4	1.4	0.443179
6.8	5.52222	0.0969444	1.26826	2.16408	9	1.27778	1.27778	0.378109
5.3	5.625	0.0993333	-0.146019	-0.111979	16	-0.325	0.375	-0.59795
5.9	6.10455	0.0147403	0.432512	-0.915489	22	-0.204545	0.204545	-0.207527
5.7	6.03636	0.0281385	0.0940986	-0.675444	22	-0.336364	0.336364	-0.337668
5.6	5.97727	0.0485065	0.287867	-0.0731757	22	-0.377273	0.377273	-0.402738
5.6	5.95909	0.0672944	0.155857	-0.855534	22	-0.359091	0.368182	-0.402738
5.2	5.34706	0.00764706	0.10116	-0.369315	17	-0.147059	0.147059	-0.663021
5.2	5.38824	0.0286029	-0.934499	0.352079	17	-0.188235	0.223529	-0.663021
5.3	5.42353	0.0581618	-0.827727	0.320052	17	-0.123529	0.229412	-0.59795
5.3	5.51176	0.0648529	-0.354478	-0.24833	17	-0.211765	0.270588	-0.59795
5.6	5.88333	0.0120588	0.0666323	-0.47329	18	-0.283333	0.283333	-0.402738
5.6	5.99444	0.0429085	-0.274285	0.172989	18	-0.394444	0.394444	-0.402738
5.4	6.03333	0.0964706	0.378402	1.32329	18	-0.633333	0.633333	-0.53288
5.1	6.06667	0.161176	1.1277	2.6807	18	-0.966667	0.966667	-0.728091
5.2	6.07778	0.198301	1.42907	3.60127	18	-0.877778	0.877778	-0.663021
5.4	5.97143	0.0971429	0.239143	-1.24238	21	-0.571429	0.571429	-0.53288
5.2	5.26471	0.00992647	-0.460957	-0.627471	17	-0.0647059	0.1	-0.663021
5.3	5.35882	0.0375735	0.198886	-0.179895	17	-0.0588235	0.152941	-0.59795
5.3	5.47647	0.0769118	0.176292	-0.699596	17	-0.176471	0.258824	-0.59795
5.3	5.56471	0.0986765	0.0957871	-0.038517	17	-0.264706	0.335294	-0.59795
6	5.84795	0.043086	0.106579	0.282381	73	0.152055	0.20411	-0.142456
5.7	5.6726	0.0745167	0.473498	0.768082	73	0.0273973	0.20274	-0.337668
5.9	5.49178	0.0929871	0.475978	0.932077	73	0.408219	0.441096	-0.207527
5.6	5.31389	0.119241	0.0735517	-0.235052	72	0.286111	0.363889	-0.402738
5.2	5.14722	0.15802	-0.201336	-0.0980269	72	0.0527778	0.316667	-0.663021
4.8	5.01965	0.00675307	0.583819	2.45451	51	-0.219647	0.219647	-0.923303
4.6	4.97806	0.0157906	0.616887	0.614858	51	-0.378059	0.378059	-1.05344
4.7	4.94665	0.0280454	0.671295	1.47031	51	-0.246647	0.250569	-0.988374
4.5	4.9311	0.0352938	0.475338	1.18871	51	-0.431098	0.431098	-1.11851
4.5	4.9438	0.046786	0.516491	0.656784	51	-0.443804	0.443804	-1.11851
4.6	4.84849	0.0132422	0.945743	0.968484	53	-0.248491	0.248491	-1.05344
4.7	4.83668	0.026395	1.02279	0.993549	53	-0.136679	0.151811	-0.988374
4.5	4.84198	0.0448718	0.99068	0.683493	53	-0.341981	0.341981	-1.11851
4.5	4.84151	0.0637041	0.655979	0.315508	53	-0.341509	0.345283	-1.11851
5.4	5.41765	0.0152941	0.0730857	-1.04723	17	-0.0176471	0.1	-0.53288
5.1	5.39412	0.0268382	-0.280622	-0.14207	17	-0.294118	0.294118	-0.728091
5.2	5.47059	0.0447059	-0.370583	0.177644	17	-0.270588	0.294118	-0.663021
5.2	5.60588	0.0593382	0.0991959	-0.883725	17	-0.405882	0.405882	-0.663021
5.3	5.65294	0.121397	-0.00337249	-0.560326	17	-0.352941	0.4	-0.59795
4.5	4.88145	0.0718055	0.65748	1.01686	49	-0.381449	0.386347	-1.11851
4.6	4.80761	0.0830134	0.801088	2.81801	51	-0.207614	0.278987	-1.05344
4.7	4.69767	0.00416496	0.389162	0.84258	53	0.0023348	0.0413506	-0.988374
4.5	4.7021	0.014778	0.462329	-0.0561802	53	-0.202101	0.202101	-1.11851
4.5	4.73521	0.0373545	0.495235	0.386443	53	-0.235208	0.244265	-1.11851
5.3	5.41176	0.0211029	2.54293	8.19171	17	-0.111765	0.111765	-0.59795
5.3	5.55882	0.0413235	0.487901	0.377691	17	-0.258824	0.270588	-0.59795
5.6	5.60588	0.0593382	0.158001	-0.146115	17	-0.00588235	0.182353	-0.402738
5.9	5.61176	0.0873529	0.479153	0.708971	17	0.288235	0.347059	-0.207527
6.5	5.59412	0.104338	0.627284	1.48748	17	0.905882	0.905882	0.182897
4.5	4.79097	0.0625116	0.315337	0.77572	52	-0.290974	0.311358	-1.11851
5.6	5.65	0.136	0.164065	-0.426632	16	-0.05	0.2875	-0.402738
6.9	7.04167	0.0181884	0.192824	-1.02706	24	-0.141667	0.15	0.443179
6.7	6.97917	0.0269384	0.171008	-0.633082	24	-0.279167	0.279167	0.313038
6.3	6.94583	0.0469384	-0.036163	-0.631084	24	-0.645833	0.645833	0.0527556
6	6.90833	0.092971	-0.176473	-0.714728	24	-0.908333	0.908333	-0.142456
5.9	6.8375	0.130272	-0.0719683	-0.855563	24	-0.9375	0.9375	-0.207527
5.9	5.85455	0.0262098	-2.02462	11.6068	66	0.0454545	0.10303	-0.207527
5.6	5.7	0.0295385	1.0688	2.21686	66	-0.1	0.139394	-0.402738
5.2	5.5197	0.0508368	0.743615	1.55754	66	-0.319697	0.325758	-0.663021
5.1	5.36212	0.0602354	0.216254	1.67592	66	-0.262121	0.298485	-0.728091
5	5.01244	0.00369488	1.12684	2.90258	52	-0.0124423	0.0321731	-0.793162
5.7	5.89342	0.00995614	-0.196297	1.38332	76	-0.193421	0.196053	-0.337668
5.9	5.77368	0.0310316	1.45073	4.10378	76	0.126316	0.181579	-0.207527
5.6	5.60658	0.0470228	1.10574	3.3087	76	-0.00657895	0.153947	-0.402738
5.2	5.44868	0.0641316	0.716468	2.314	76	-0.248684	0.269737	-0.663021
5.1	5.27632	0.0844982	0.599484	1.57417	76	-0.176316	0.255263	-0.728091
4.8	4.9706	0.0165276	0.971701	1.94668	53	-0.170604	0.173057	-0.923303
4.6	4.95883	0.0338066	1.55901	4.48391	53	-0.35883	0.35883	-1.05344
4.7	4.94432	0.0480511	1.21657	3.97283	53	-0.244321	0.259415	-0.988374
4.5	4.93592	0.0567216	0.85846	2.24503	53	-0.435925	0.435925	-1.11851
6.3	6.80455	0.00902597	-0.0969277	-0.130634	22	-0.504545	0.504545	0.0527556
6	6.79091	0.0256277	0.085469	0.165531	22	-0.790909	0.790909	-0.142456
5.9	6.74091	0.0444372	0.810629	1.39114	22	-0.840909	0.840909	-0.207527
5.7	6.69545	0.0547403	1.09069	2.90491	22	-0.995455	0.995455	-0.337668
5.2	5.55806	0.0109995	-0.132388	-0.0711602	62	-0.358065	0.358065	-0.663021
5.1	5.39839	0.0424564	0.17337	1.41086	62	-0.298387	0.314516	-0.728091
5	5.28065	0.0658488	-0.222877	2.11182	62	-0.280645	0.316129	-0.793162
4.8	5.17903	0.0895531	-0.131986	2.51183	62	-0.379032	0.417742	-0.923303
5	5.26349	0.0897747	0.926246	3.99466	63	-0.263492	0.304762	-0.793162
4.7	5.11475	0.107279	-0.765083	2.50496	61	-0.414754	0.47377	-0.988374
5.6	5.50526	0.027193	0.903757	0.566616	19	0.0947368	0.157895	-0.402738
5.4	5.50526	0.067193	1.04772	0.567917	19	-0.105263	0.189474	-0.53288
5.1	5.49474	0.107193	0.49798	-0.341347	19	-0.394737	0.405263	-0.728091
5.2	5.52105	0.112865	0.464261	0.174292	19	-0.321053	0.363158	-0.663021
5.2	5.57368	0.120936	0.140555	0.012106	19	-0.373684	0.415789	-0.663021
6.1	5.90877	0.0222431	0.11259	0.07921	57	0.191228	0.205263	-0.0773855
6	5.81579	0.0767105	1.13697	2.57961	57	0.184211	0.264912	-0.142456
5.7	5.70877	0.0933145	-0.117222	0.74639	57	-0.00877193	0.226316	-0.337668
5.9	5.53158	0.126485	-0.350856	0.119719	57	0.368421	0.403509	-0.207527
5.6	5.34561	0.151811	-0.485193	0.0479973	57	0.254386	0.345614	-0.402738
5.6	5.7194	0.00916327	0.130104	0.328436	67	-0.119403	0.125373	-0.402738
5.2	5.54776	0.0261692	0.572661	3.66161	67	-0.347761	0.350746	-0.663021
5.1	5.38507	0.0349254	-0.451198	0.848116	67	-0.285075	0.3	-0.728091
5	5.27164	0.0593351	-0.385015	0.419736	67	-0.271642	0.304478	-0.793162
4.8	5.19104	0.0847671	-0.352888	0.474496	67	-0.391045	0.41791	-0.923303
5.6	6.665	0.0918684	0.598832	0.274492	20	-1.065	1.065	-0.402738
5.3	5.33333	0.0166667	1.80455	4.08132	15	-0.0333333	0.0733333	-0.59795
5.3	5.41333	0.0455238	1.07313	1.20317	15	-0.113333	0.166667	-0.59795
5.3	5.48667	0.108381	1.16125	1.68291	15	-0.186667	0.253333	-0.59795
5.6	5.51333	0.101238	0.59685	-0.18977	15	0.0866667	0.273333	-0.402738
5.9	5.48667	0.121238	0.409858	-0.198712	15	0.413333	0.466667	-0.207527
5.7	5.97368	0.00426901	-1.02116	1.91493	19	-0.273684	0.273684	-0.337668
5.6	6.07368	0.0353801	-0.246102	-0.382264	19	-0.473684	0.473684	-0.402738
5.6	6.13684	0.0646784	-0.508186	-0.667631	19	-0.536842	0.536842	-0.402738
5.4	6.17895	0.121754	-0.180362	0.282946	19	-0.778947	0.778947	-0.53288
5.1	6.17368	0.159825	-0.0228704	0.0983414	19	-1.07368	1.07368	-0.728091
6	6.51429	0.0205291	-0.431712	-0.78037	28	-0.514286	0.514286	-0.142456
5.9	6.48214	0.0341138	-0.59187	-0.611145	28	-0.582143	0.582143	-0.207527
5.7	6.46429	0.042381	-0.466859	-0.51025	28	-0.764286	0.764286	-0.337668
5.6	6.44286	0.0499471	-0.541666	-0.318731	28	-0.842857	0.842857	-0.402738
5.6	6.43929	0.0728439	-0.293151	-0.105895	28	-0.839286	0.839286	-0.402738
6.3	6.712	0.135267	-0.169249	-0.85182	25	-0.412	0.46	0.0527556
6.2	5.96852	0.0191789	-0.51133	1.47978	54	0.231481	0.231481	-0.0123149
6.1	5.82778	0.0722327	0.0734909	0.407545	54	0.272222	0.32037	-0.0773855
6	5.76111	0.127704	0.764153	2.24948	54	0.238889	0.353704	-0.142456
5.7	5.61667	0.146321	0.0983698	0.17925	54	0.0833333	0.305556	-0.337668
5.9	5.42593	0.17856	0.332647	0.258497	54	0.474074	0.544444	-0.207527
5.1	5.34603	0.00994368	-0.542319	1.47168	63	-0.246032	0.249206	-0.728091
5	5.21746	0.0188838	0.483611	2.03579	63	-0.21746	0.22381	-0.793162
4.8	5.08254	0.0230773	-0.0366745	1.15106	63	-0.28254	0.288889	-0.923303
4.7	5.00952	0.0518433	2.11409	11.3653	63	-0.309524	0.319048	-0.988374
5.2	4.93333	0.0480645	-0.0147543	0.751736	63	0.266667	0.288889	-0.663021
4.7	4.87777	0.0931098	0.419718	1.46518	50	-0.177773	0.27827	-0.988374
7.3	6.84231	0.0129385	0.293744	-0.584532	26	0.457692	0.457692	0.703461
6.8	6.76538	0.0295538	-0.180776	-1.1244	26	0.0346154	0.134615	0.378109
6.9	6.71154	0.0514615	0.00158141	-1.30202	26	0.188462	0.234615	0.443179
6.7	6.68846	0.0810615	-0.042829	-1.15147	26	0.0115385	0.242308	0.313038
5.9	6.08286	0.0132269	0.723967	0.612374	35	-0.182857	0.182857	-0.207527
5.8	6.02571	0.0313782	0.225075	0.5271	35	-0.225714	0.242857	-0.272597
5.7	6.02857	0.0368067	0.706452	0.0516396	35	-0.328571	0.328571	-0.337668
5.8	6.10571	0.0599664	0.631002	-0.122019	35	-0.305714	0.311429	-0.272597
6	6.13429	0.0834958	0.411921	-0.89888	35	-0.134286	0.237143	-0.142456
7.3	7.19583	0.00650362	-0.463784	0.034431	24	0.104167	0.104167	0.703461
7	7.04583	0.0251993	-0.486182	2.36315	24	-0.0458333	0.1125	0.50825
7	6.97917	0.0591123	0.244847	4.72119	24	0.0208333	0.145833	0.50825
7.3	6.9125	0.0950543	-0.0405122	1.63882	24	0.3875	0.429167	0.703461
5	5.06452	0.0115071	0.432178	0.735558	62	-0.0645161	0.0870968	-0.793162
4.8	4.94032	0.0217901	-0.357356	0.416742	62	-0.140323	0.166129	-0.923303
4.7	4.86774	0.0382866	-0.533428	2.03561	62	-0.167742	0.209677	-0.988374
5.2	4.83226	0.0556637	0.187452	2.88171	62	0.367742	0.383871	-0.663021
5.2	4.83871	0.0929032	0.426109	2.95909	62	0.36129	0.393548	-0.663021
4.7	4.78667	0.0311818	0.989121	1.1068	45	-0.0866667	0.144444	-0.988374
5.2	4.92	0.0525455	0.762054	1.66436	45	0.28	0.32	-0.663021
5.2	5.05778	0.0788586	0.545493	1.03673	45	0.142222	0.248889	-0.663021
5.4	5.14	0.107909	0.541716	0.760991	45	0.26	0.348889	-0.53288
6.6	5.17111	0.128919	0.545526	1.09323	45	1.42889	1.42889	0.247967
4.5	4.72492	0.00933855	0.0347514	0.716144	51	-0.224918	0.224918	-1.11851
4.5	4.76261	0.023053	-0.200456	-0.578805	51	-0.26261	0.266532	-1.11851
4.5	4.81285	0.0448028	-0.00365265	-0.505823	51	-0.312849	0.324614	-1.11851
4.6	4.85526	0.0707743	0.142917	0.224287	51	-0.255264	0.299186	-1.05344
7.3	7.08	0.00666667	-0.0998433	-0.505435	25	0.22	0.22	0.703461
7.3	7.084	0.0255667	-0.182187	0.171814	25	0.216	0.224	0.703461
6.8	7.1	0.0466667	-0.512148	1.37268	25	-0.3	0.324	0.378109
6.9	7.1	0.0616667	0.10647	-0.132713	25	-0.2	0.256	0.443179
6.7	7.088	0.104433	-0.0197624	-0.390795	25	-0.388	0.42	0.313038
7.5	7.71892	0.0182432	-0.0777715	-0.330677	37	-0.218919	0.224324	0.833603
6.9	7.54324	0.0580781	0.150571	0.0604037	37	-0.643243	0.643243	0.443179
7.1	7.34865	0.0775676	-0.323244	0.0668044	37	-0.248649	0.318919	0.57332
6.7	7.18108	0.10491	0.044598	0.304245	37	-0.481081	0.502703	0.313038
6.1	7.03243	0.166141	0.22583	0.174745	37	-0.932432	0.932432	-0.0773855
7.3	6.88095	0.142619	0.877416	1.43623	21	0.419048	0.504762	0.703461
9.2	5.81429	0.169974	-0.263904	0.682623	56	3.38571	3.38571	1.9398
5.8	6.06538	0.0183538	0.378658	0.374317	26	-0.265385	0.265385	-0.272597
5.7	6.06538	0.0183538	0.0649659	-0.908101	26	-0.365385	0.365385	-0.337668
5.8	6.11923	0.0432154	0.243517	-0.656132	26	-0.319231	0.319231	-0.272597
6	6.19231	0.109538	0.912251	1.90747	26	-0.192308	0.292308	-0.142456
5.8	6.33462	0.194354	1.18716	3.82174	26	-0.534615	0.557692	-0.272597
5.2	4.7807	0.0240852	0.334179	-0.320607	57	0.419298	0.419298	-0.663021
5.2	5.18421	0.103139	1.00279	0.918933	57	0.0157895	0.236842	-0.663021
5.4	5.52105	0.170977	0.300181	0.21222	57	-0.121053	0.307018	-0.53288
6.6	5.71228	0.205382	-0.181897	0.443277	57	0.887719	0.894737	0.247967
8.2	5.75789	0.237124	-0.198803	0.653906	57	2.44211	2.44211	1.2891
6.1	6.96341	0.019878	0.865353	1.69731	41	-0.863415	0.863415	-0.0773855
6.1	6.89024	0.0684024	0.869883	0.819858	41	-0.790244	0.790244	-0.0773855
5.9	6.83171	0.12072	1.14441	1.44036	41	-0.931707	0.931707	-0.207527
5.8	6.7878	0.169598	1.11883	2.57511	41	-0.987805	0.987805	-0.272597
5.7	6.7439	0.226524	1.19721	4.51833	41	-1.0439	1.05366	-0.337668
7.1	7.12195	0.0197561	0.440354	-0.342177	41	-0.0219512	0.114634	0.57332
6.7	7.00732	0.0411951	1.51764	4.80348	41	-0.307317	0.307317	0.313038
6.1	6.90488	0.0739756	1.94461	5.8516	41	-0.804878	0.804878	-0.0773855
6.1	6.80244	0.141744	1.83283	4.3705	41	-0.702439	0.702439	-0.0773855
5.9	6.68049	0.18861	1.6447	4.2926	41	-0.780488	0.780488	-0.207527
6.7	6.9375	0.00592391	0.458371	0.172367	24	-0.2375	0.2375	0.313038
6.3	6.97083	0.0230254	0.297762	1.60671	24	-0.670833	0.670833	0.0527556
6	6.9375	0.05375	-0.066014	2.12384	24	-0.9375	0.9375	-0.142456
5.9	6.89167	0.0799275	-0.361089	1.78242	24	-0.991667	0.991667	-0.207527
5.7	6.81667	0.084058	-0.495854	2.05632	24	-1.11667	1.11667	-0.337668
4.5	4.58946	0.0203236	0.494569	-0.451793	51	-0.0894587	0.116968	-1.11851
4.5	4.68759	0.0328124	0.10425	-0.144112	51	-0.187589	0.211118	-1.11851
4.6	4.75561	0.0501187	-0.314898	-0.0888817	51	-0.155612	0.233624	-1.05344
4.7	4.80192	0.0714329	-0.199228	0.00468175	51	-0.101922	0.236967	-0.988374
4.8	4.85125	0.102716	0.287367	0.496618	51	-0.0512547	0.256214	-0.923303
4.8	4.89844	0.00999752	1.40886	3.91368	64	-0.0984375	0.101563	-0.923303
4.7	4.82344	0.0300769	1.83116	6.63279	64	-0.123437	0.148437	-0.988374
5.2	4.80625	0.0574206	1.43155	6.50668	64	0.39375	0.421875	-0.663021
5.2	4.86719	0.099065	1.19582	4.61795	64	0.332813	0.395313	-0.663021
5.4	4.94687	0.134276	1.04224	5.09677	64	0.453125	0.509375	-0.53288
5.2	5.29333	0.0518192	0.727093	2.40654	60	-0.0933333	0.17	-0.663021
5.4	5.65667	0.10148	0.488807	1.50412	60	-0.256667	0.316667	-0.53288
6.6	5.84667	0.112701	-0.462966	0.59641	60	0.753333	0.753333	0.247967
8.2	5.87833	0.142065	-0.709764	0.366531	60	2.32167	2.32167	1.2891
6	6.76538	0.164754	0.377004	-0.252776	26	-0.765385	0.765385	-0.142456
4.5	4.60043	0.00504533	0.640246	1.39042	49	-0.100426	0.102091	-1.11851
4.6	4.67809	0.0165593	-0.605622	-0.00059943	49	-0.0780906	0.127304	-1.05344
4.7	4.70548	0.0300877	-0.407078	-0.382414	49	-0.00547843	0.1347	-0.988374
4.8	4.73882	0.050344	-0.368278	-0.805131	49	0.0611811	0.175988	-0.923303
8	7.34857	0.039042	-0.244384	-0.529216	35	0.651429	0.651429	1.15896
7.5	7.11143	0.0369244	0.355695	0.440866	35	0.388571	0.394286	0.833603
6.9	6.91429	0.070084	0.79488	0.402371	35	-0.0142857	0.197143	0.443179
7.1	6.73714	0.0971092	0.244616	-0.056716	35	0.362857	0.408571	0.57332
6.7	6.61429	0.12479	0.193226	-0.29024	35	0.0857143	0.291429	0.313038
6.8	7.025	0.0100926	-1.25391	2.74687	28	-0.225	0.232143	0.378109
6.9	6.90357	0.032209	-0.264404	1.70097	28	-0.00357143	0.117857	0.443179
6.7	6.78929	0.0743254	0.0620802	0.974409	28	-0.0892857	0.203571	0.313038
6.3	6.76429	0.126825	0.226219	0.0887628	28	-0.464286	0.492857	0.0527556
9.2	8.03514	0.222342	-0.32723	-0.82749	37	1.16486	1.16486	1.9398
8.4	8.33243	0.283363	-0.0579749	0.46434	37	0.0675676	0.413514	1.41924
8.5	8.29189	0.537432	-0.872951	3.10003	37	0.208108	0.527027	1.48431
7.6	8.10541	0.621637	-0.834772	2.39079	37	-0.505405	0.764865	0.898673
7	7.27097	0.0067957	-1.30294	3.08379	31	-0.270968	0.270968	0.50825
7.3	7.24516	0.0205591	-0.36768	0.0101457	31	0.0548387	0.112903	0.703461
7.3	7.23548	0.0543656	-0.427279	-0.488174	31	0.0645161	0.187097	0.703461
6.8	7.22581	0.0773118	0.00315646	-0.197096	31	-0.425806	0.43871	0.378109
5.5	4.77976	0.0612217	-0.478299	-0.696141	44	0.720245	0.720245	-0.467809
6.7	6.94324	0.0230781	1.51794	3.79477	37	-0.243243	0.243243	0.313038
6.1	6.85135	0.0842342	1.86279	5.96025	37	-0.751351	0.751351	-0.0773855
6.1	6.77297	0.139249	0.943294	0.762582	37	-0.672973	0.672973	-0.0773855
5.9	6.66486	0.192898	0.817503	0.185974	37	-0.764865	0.764865	-0.207527
5.8	6.61622	0.238063	1.00641	0.309543	37	-0.816216	0.816216	-0.272597
7.6	8.34043	0.0250694	0.492166	0.110628	47	-0.740426	0.740426	0.898673
7.3	8.14681	0.0638483	1.40278	2.12708	47	-0.846809	0.846809	0.703461
7.9	7.95319	0.110805	1.43836	2.45133	47	-0.0531915	0.231915	1.09388
8	7.72553	0.16716	1.26718	2.60685	47	0.274468	0.406383	1.15896
7.5	7.52766	0.213784	1.00334	1.58696	47	-0.0276596	0.359574	0.833603
7.3	7.95278	0.571135	-0.169147	1.29785	36	-0.652778	0.825	0.703461
6.1	4.72092	0.0807439	-0.22968	-0.123506	50	1.37908	1.37908	-0.0773855
4.6	4.55602	0.0113047	0.689976	1.24834	53	0.0439844	0.0827127	-1.05344
4.7	4.63399	0.0245877	-0.207746	-0.363606	53	0.0660059	0.127816	-0.988374
4.8	4.68804	0.0407924	-0.326537	-0.515676	53	0.111957	0.172013	-0.923303
7.3	7.71935	0.0229462	-0.0430103	-0.187138	31	-0.419355	0.419355	0.703461
7.6	7.81935	0.0622796	0.617364	0.489626	31	-0.219355	0.258065	0.898673
7.2	7.75806	0.0665161	0.885521	0.673704	31	-0.558065	0.558065	0.638391
8.3	7.64839	0.0865806	0.671975	-0.266388	31	0.651613	0.651613	1.35417
8.8	7.5	0.128	0.21942	-0.345501	31	1.3	1.3	1.67952
6.9	7.26	0.135586	0.785721	1.25696	30	-0.36	0.393333	0.443179
5.5	4.71793	0.064466	-0.365159	-0.587811	51	0.782071	0.782071	-0.467809
7.3	7.10714	0.125132	0.282574	-0.542685	28	0.192857	0.335714	0.703461
6.8	7.08929	0.172103	0.437083	-0.770278	28	-0.289286	0.382143	0.378109
8.4	5.55217	0.173217	-0.114913	-0.596099	46	2.84783	2.84783	1.41924
8.5	8.71316	0.0811735	0.185474	0.0860587	38	-0.213158	0.260526	1.48431
7.6	8.58158	0.0966785	0.175496	-0.728315	38	-0.981579	0.981579	0.898673
7.3	8.38947	0.116643	0.0517994	-0.892743	38	-1.08947	1.08947	0.703461
7.9	8.12105	0.123329	0.242034	-0.610405	38	-0.221053	0.326316	1.09388
8	7.84737	0.19175	0.251345	-0.325189	38	0.152632	0.378947	1.15896
6	6.21935	0.0716129	1.73109	3.46793	31	-0.219355	0.23871	-0.142456
7.8	6.79355	0.19929	0.648716	1.45177	31	1.00645	1.01935	1.02881
7.6	7.23871	0.288452	-0.588974	-0.293986	31	0.36129	0.490323	0.898673
7.5	7.36452	0.481699	-0.511725	-0.840675	31	0.135484	0.580645	0.833603
7.3	7.27097	0.582129	-0.485622	-0.873175	31	0.0290323	0.654839	0.703461
7	7.24138	0.00894089	-0.14211	0.448663	29	-0.241379	0.241379	0.50825
7	7.1931	0.0342365	0.616701	0.551665	29	-0.193103	0.206897	0.50825
7.3	7.14828	0.0761576	-0.0293765	-0.136651	29	0.151724	0.248276	0.703461
7.5	7.13611	0.527516	-0.197308	-1.07293	36	0.363889	0.652778	0.833603
3.5	3.56557	0.0252951	0.771992	0.915823	61	-0.0655738	0.12459	-1.76922
3.5	3.77377	0.0653005	0.321571	-0.213147	61	-0.27377	0.296721	-1.76922
3.5	3.85246	0.0602022	0.0568434	0.100074	61	-0.352459	0.362295	-1.76922
4.2	3.8623	0.0650546	0.288485	1.1284	61	0.337705	0.363934	-1.31373
7.3	7.9375	0.0360106	1.47846	4.378	48	-0.6375	0.6375	0.703461
7.9	7.75208	0.0548892	1.3762	4.25044	48	0.147917	0.227083	1.09388
8	7.56458	0.082336	1.68051	6.00558	48	0.435417	0.46875	1.15896
7.5	7.37708	0.145634	2.02461	7.60482	48	0.122917	0.302083	0.833603
6.9	7.20833	0.171418	2.4965	10.5568	48	-0.308333	0.345833	0.443179
6.9	7.83684	0.0677952	0.4539	-0.0661478	38	-0.936842	0.936842	0.443179
7.1	7.58158	0.0847866	1.06611	1.47156	38	-0.481579	0.481579	0.57332
6.7	7.34474	0.116053	1.05736	1.22355	38	-0.644737	0.644737	0.313038
6.1	7.19474	0.194566	0.842892	0.20638	38	-1.09474	1.09474	-0.0773855
6.1	7.05526	0.298755	0.99162	0.442294	38	-0.955263	0.955263	-0.0773855
5.8	6.04054	0.0413664	0.835632	0.00655948	37	-0.240541	0.245946	-0.272597
6	6.51622	0.113619	-0.0652846	0.0746191	37	-0.516216	0.532432	-0.142456
7.8	6.92973	0.244369	-0.424574	-0.391902	37	0.87027	0.87027	1.02881
7.6	7.12432	0.416336	-0.303586	-0.672502	37	0.475676	0.610811	0.898673
5.4	5.3875	0.0475	1.08047	2.87913	48	0.0125	0.154167	-0.53288
6.6	5.61875	0.0887899	0.615891	1.11754	48	0.98125	0.98125	0.247967
8.2	5.69583	0.127216	0.23229	1.60056	48	2.50417	2.50417	1.2891
7.6	6.77879	0.535473	0.585601	-0.406126	33	0.821212	0.954545	0.898673
9.2	5.62979	0.152137	-0.225223	-0.591414	47	3.57021	3.57021	1.9398
5.8	5.93333	0.0172917	0.650226	0.913838	33	-0.133333	0.145455	-0.272597
6	6.0697	0.053428	0.264912	-0.251322	33	-0.069697	0.178788	-0.142456
5.8	6.33636	0.131136	0.228808	0.298265	33	-0.536364	0.542424	-0.272597
6	6.60909	0.270227	0.567204	1.4376	33	-0.609091	0.657576	-0.142456
7.8	6.73636	0.311761	0.682638	1.71065	33	1.06364	1.10606	1.02881
7.5	8.05484	0.0405591	0.984595	0.481011	31	-0.554839	0.554839	0.833603
7.5	7.87419	0.0726452	1.13423	1.93147	31	-0.374194	0.380645	0.833603
7.1	7.72258	0.0984731	1.49963	3.64098	31	-0.622581	0.622581	0.57332
7.3	7.56129	0.0957849	0.677315	1.00754	31	-0.26129	0.319355	0.703461
7.9	7.41042	0.0154211	-1.31822	5.29356	48	0.489583	0.489583	1.09388
8	7.2375	0.0343085	1.36974	5.24166	48	0.7625	0.7625	1.15896
7.5	7.04167	0.0399291	1.38002	3.3498	48	0.458333	0.470833	0.833603
6.9	6.86875	0.0630452	0.597833	0.214191	48	0.03125	0.197917	0.443179
7.1	6.70417	0.0999823	0.318307	-0.753679	48	0.395833	0.433333	0.57332
8.4	9.01304	0.0700483	-0.372741	4.80394	46	-0.613043	0.626087	1.41924
8.5	9.05	0.213222	-1.63239	6.22743	46	-0.55	0.628261	1.48431
7.6	8.82391	0.284971	-1.31087	3.15668	46	-1.22391	1.2587	0.898673
7.3	8.57391	0.26686	-0.603892	1.35212	46	-1.27391	1.28696	0.703461
7.9	8.28913	0.318768	-1.01296	1.02101	46	-0.38913	0.584783	1.09388
6.1	6.49583	0.0473732	1.05167	0.555283	24	-0.395833	0.395833	-0.0773855
5.9	6.425	0.0602174	0.339436	-1.07093	24	-0.525	0.525	-0.207527
5.8	6.35833	0.079058	0.582571	-0.349961	24	-0.558333	0.558333	-0.272597
5.7	6.30833	0.117319	0.652174	-0.554069	24	-0.608333	0.608333	-0.337668
5.8	6.275	0.148043	0.447772	-0.390872	24	-0.475	0.5	-0.272597
6	5.89706	0.0245365	1.5091	2.90029	34	0.102941	0.161765	-0.142456
5.8	6.17353	0.0904902	0.66801	0.842909	34	-0.373529	0.391176	-0.272597
6	6.43235	0.180437	0.116748	-0.927524	34	-0.432353	0.491176	-0.142456
7.8	6.65882	0.294617	0.288997	-1.04338	34	1.14118	1.14118	1.02881
7.3	7.53103	0.200074	0.613193	0.704355	29	-0.231034	0.382759	0.703461
8.4	9.51562	0.0394254	0.323451	0.37174	32	-1.11562	1.11562	1.41924
7.8	9.28125	0.0667339	0.687757	0.528999	32	-1.48125	1.48125	1.02881
7.5	9.04687	0.286442	-1.16914	4.85615	32	-1.54687	1.57187	0.833603
7.5	8.8875	0.163065	0.206734	-0.737983	32	-1.3875	1.3875	0.833603
7.1	8.70937	0.160877	0.233939	-0.464167	32	-1.60937	1.60937	0.57332
8.2	6.36604	0.0484398	-0.201111	2.21402	53	1.83396	1.83396	1.2891
9.2	6.92264	0.269478	2.32231	11.0392	53	2.27736	2.28868	1.9398
8.4	7.19245	0.309942	-0.0374172	0.278979	53	1.20755	1.21509	1.41924
8.5	7.18491	0.393614	-0.0746936	0.632696	53	1.31509	1.33396	1.48431
7.6	6.99057	0.417409	-0.326564	-0.471072	53	0.609434	0.7	0.898673
7.3	7.38065	0.0136129	0.671634	0.541519	31	-0.0806452	0.1	0.703461
7.3	7.31935	0.0496129	0.997481	1.01773	31	-0.0193548	0.16129	0.703461
7	7.27742	0.0964731	0.48923	-0.569481	31	-0.277419	0.322581	0.50825
7	7.24516	0.163892	0.334574	-0.744545	31	-0.245161	0.380645	0.50825
7.3	7.19677	0.180989	0.22377	-1.01259	31	0.103226	0.367742	0.703461
5.9	5.05556	0.0281761	-0.249181	0.958483	54	0.844444	0.844444	-0.207527
5.8	5.12593	0.125353	-0.383945	-0.648186	54	0.674074	0.674074	-0.272597
6.2	5.0566	0.177504	0.0996776	-0.322421	53	1.1434	1.1434	-0.0123149
6.1	4.92264	0.214862	-0.0849847	-0.66739	53	1.17736	1.17736	-0.0773855
5.7	5.97667	0.0232299	-1.70574	6.20843	30	-0.276667	0.296667	-0.337668
5.8	6.11	0.0657586	-0.907587	0.81541	30	-0.31	0.356667	-0.272597
6	6.27	0.113897	-0.154671	0.287541	30	-0.27	0.343333	-0.142456
5.8	6.51	0.168517	0.163618	0.740773	30	-0.71	0.73	-0.272597
6	6.65333	0.257057	0.0716356	-0.119824	30	-0.653333	0.693333	-0.142456
6	4.78269	0.219106	0.108855	-1.17248	52	1.21731	1.21731	-0.142456
7.2	7.925	0.612315	0.0152026	-0.861237	28	-0.725	0.875	0.638391
5.1	4.6381	0.0760743	-1.60473	6.23311	42	0.461905	0.466667	-0.728091
5.9	4.75	0.188902	-0.832838	4.42005	42	1.15	1.15476	-0.207527
5.8	4.72857	0.313798	0.12329	2.29754	42	1.07143	1.10476	-0.272597
6.2	4.65238	0.355238	1.29776	4.7322	42	1.54762	1.58571	-0.0123149
6.1	4.5119	0.352294	0.88979	1.58538	42	1.5881	1.60714	-0.0773855
5	4.03103	0.0313007	-0.0782342	1.32763	58	0.968966	0.968966	-0.793162
5.1	4.35862	0.0873805	-0.131969	0.366517	58	0.741379	0.741379	-0.728091
5.9	4.40862	0.12817	-0.201155	-0.110748	58	1.49138	1.49138	-0.207527
5.8	4.33448	0.160895	0.349369	0.460201	58	1.46552	1.46552	-0.272597
7.6	7.288	0.7986	0.462443	-0.194963	25	0.312	0.784	0.898673
4.2	3.83818	0.0205522	0.227069	-0.510816	55	0.361818	0.361818	-1.31373
5	4.15091	0.0455084	0.485814	-0.105935	55	0.849091	0.849091	-0.793162
5.1	4.41273	0.0907609	0.240192	-0.55897	55	0.687273	0.687273	-0.728091
5.9	4.40364	0.215172	1.42579	3.44249	55	1.49636	1.50364	-0.207527
5.8	4.34727	0.286983	1.03655	1.22625	55	1.45273	1.46	-0.272597
7.6	7.07931	0.148128	-0.997374	0.218948	29	0.52069	0.52069	0.898673
7.5	7.56897	0.285788	-0.636011	-0.624797	29	-0.0689655	0.462069	0.833603
7.3	7.85862	0.428227	-0.41607	-1.13545	29	-0.558621	0.744828	0.703461
7.6	7.9931	0.557094	-0.171893	-1.04733	29	-0.393103	0.731034	0.898673
3.3	3.62179	0.0152331	-0.684127	1.11182	78	-0.321795	0.324359	-1.89936
3.5	3.8359	0.0288245	0.101782	-0.231935	78	-0.335897	0.335897	-1.76922
3.5	4.02308	0.0537463	-0.307508	-0.280724	78	-0.523077	0.523077	-1.76922
3.5	3.99103	0.0629054	0.42871	0.36917	78	-0.491026	0.491026	-1.76922
4.2	3.93974	0.0839843	0.676366	-0.0104413	78	0.260256	0.339744	-1.31373
7.5	8	0.0445455	0.190626	1.10098	23	-0.5	0.5	0.833603
7.3	8.33913	0.127036	-0.471096	-0.0187597	23	-1.03913	1.03913	0.703461
7.6	8.47391	0.166561	-0.343343	-0.143303	23	-0.873913	0.882609	0.898673
7.2	8.31304	0.202095	-0.333726	-0.219101	23	-1.11304	1.11304	0.638391
8.3	8.08261	0.268775	-0.472094	0.44562	23	0.217391	0.408696	1.35417
6.8	4.69482	0.0716731	-0.344464	0.8878	48	2.10518	2.10518	0.378109
7.5	7.69714	0.0108739	0.389814	-0.00636388	35	-0.197143	0.197143	0.833603
7.1	7.53714	0.0212269	0.693828	0.0680558	35	-0.437143	0.437143	0.57332
7.3	7.41429	0.0277311	0.368078	-0.362096	35	-0.114286	0.154286	0.703461
7.3	7.33429	0.0534958	0.175236	-0.755623	35	-0.0342857	0.182857	0.703461
7	7.28857	0.0951597	0.273085	-0.830112	35	-0.288571	0.328571	0.50825
4.7	4.60088	0.00692281	-0.21024	-0.430081	49	0.0991241	0.102803	-0.988374
4.8	4.66026	0.0157509	-0.710792	0.199904	49	0.139735	0.14654	-0.923303
5.5	4.68275	0.0335051	-0.570131	0.414918	49	0.817251	0.817251	-0.467809
6.1	4.68644	0.0541544	-0.518421	0.678394	49	1.41356	1.41356	-0.0773855
10.7	9.76905	0.030482	-1.31711	4.1881	42	0.930952	0.930952	2.91586
10.4	9.60714	0.076777	0.1463	0.374579	42	0.792857	0.792857	2.72065
10.1	9.41905	0.160116	0.548644	1.33996	42	0.680952	0.709524	2.52544
9.5	9.27857	0.250017	0.783451	3.0185	42	0.221429	0.435714	2.13501
8.4	9.09762	0.394872	1.02246	3.58322	42	-0.697619	0.754762	1.41924
7.8	8.91667	0.05	0.493363	-0.89666	36	-1.11667	1.11667	1.02881
7.5	8.725	0.0916429	0.767544	-0.201635	36	-1.225	1.225	0.833603
7.5	8.54722	0.116278	0.902344	0.246515	36	-1.04722	1.04722	0.833603
7.1	8.36944	0.142183	0.999995	0.888318	36	-1.26944	1.26944	0.57332
7.3	8.17222	0.180349	1.39383	3.50369	36	-0.872222	0.872222	0.703461
3.5	3.46071	0.0097013	-0.428582	0.731715	56	0.0392857	0.0714286	-1.76922
3.5	3.64464	0.0312435	-0.225763	0.0144988	56	-0.144643	0.180357	-1.76922
4.2	3.81964	0.0656071	-0.179594	-0.35116	56	0.380357	0.391071	-1.31373
7.8	6.25926	0.0332764	-0.611965	-0.691274	27	1.54074	1.54074	1.02881
7.6	6.62593	0.151225	-0.0418728	-0.250148	27	0.974074	0.974074	0.898673
7.5	6.98519	0.37208	0.161431	-0.336445	27	0.514815	0.67037	0.833603
7.3	7.18889	0.67641	0.802925	0.881404	27	0.111111	0.637037	0.703461
3.5	3.6375	0.0118409	-0.0178348	2.4809	56	-0.1375	0.148214	-1.76922
4.2	3.82143	0.0380779	0.342109	0.357208	56	0.378571	0.385714	-1.31373
5	3.93036	0.0879708	-0.346295	1.41964	56	1.06964	1.06964	-0.793162
5.1	3.9875	0.179659	-0.461124	4.00784	56	1.1125	1.1125	-0.728091
9.7	10.1029	0.0265244	-0.237232	-1.0202	39	-0.402945	0.402945	2.26516
9.7	10.2297	0.0578016	-0.01425	0.44597	39	-0.529736	0.529736	2.26516
9.6	10.1528	0.0946516	0.645595	1.25553	39	-0.552802	0.55793	2.20008
9.8	9.98945	0.158159	0.251219	0.682103	39	-0.189451	0.334571	2.33023
7.1	7.2	0.0448	-0.603225	0.0502579	26	-0.1	0.207692	0.57332
7.3	6.97692	0.0730462	-0.986094	1.25847	26	0.323077	0.330769	0.703461
7.3	6.88462	0.0941538	-0.724856	1.42409	26	0.415385	0.423077	0.703461
7	6.88077	0.116015	-0.966638	2.82744	26	0.119231	0.280769	0.50825
7	6.91154	0.193062	-0.350488	0.816252	26	0.0884615	0.365385	0.50825
5	3.91111	0.0991195	0.289336	0.215041	54	1.08889	1.08889	-0.793162
10.1	10.5892	0.0793243	0.290036	-0.0368615	37	-0.489189	0.494595	2.52544
9.5	10.4108	0.152658	0.735396	0.617674	37	-0.910811	0.910811	2.13501
8.4	10.1784	0.21952	0.56559	0.208088	37	-1.77838	1.77838	1.41924
7.8	9.99189	0.268544	0.614929	0.297386	37	-2.19189	2.19189	1.02881
10.4	10.4105	0.0344808	0.319327	2.04878	38	-0.0105263	0.142105	2.72065
10.1	10.3368	0.0748222	0.702691	1.1814	38	-0.236842	0.284211	2.52544
9.5	10.1447	0.226323	0.510248	0.760037	38	-0.644737	0.671053	2.13501
8.4	9.90526	0.402674	0.836769	1.28256	38	-1.50526	1.50526	1.41924
7.8	9.65	0.523649	0.71372	0.938145	38	-1.85	1.85	1.02881
6.6	5.41296	0.0143571	-0.190314	0.205052	54	1.18704	1.18704	0.247967
8.2	5.67222	0.0529874	-1.08242	1.45988	54	2.52778	2.52778	1.2891
9.2	5.82222	0.0968553	-0.741557	0.406046	54	3.37778	3.37778	1.9398
8.4	5.84074	0.153026	-0.4029	-0.0860655	54	2.55926	2.55926	1.41924
8.1	4.95031	0.0623509	0.586576	2.19195	47	3.14969	3.14969	1.22403
7.5	9.85937	0.378619	0.60224	-0.0346913	32	-2.35937	2.35937	0.833603
10.7	7.27941	0.141684	1.0976	2.60402	34	3.42059	3.42059	2.91586
8.3	7.30571	0.0246723	1.25259	0.168	35	0.994286	0.994286	1.35417
8.8	7.46571	0.046437	-0.237516	0.611411	35	1.33429	1.33429	1.67952
9.5	7.50857	0.0825714	-0.319755	-0.107255	35	1.99143	1.99143	2.13501
9.8	7.41429	0.113025	0.341679	0.395973	35	2.38571	2.38571	2.33023
4.8	4.74145	0.00637636	0.14845	2.54114	48	0.058547	0.072297	-0.923303
5.5	4.84553	0.012462	-0.199278	1.17481	48	0.654466	0.654466	-0.467809
6.1	4.89238	0.0242558	-0.322567	-0.429663	48	1.20762	1.20762	-0.0773855
6.8	4.95242	0.0426035	0.216096	1.10505	48	1.84758	1.84758	0.378109
10	9.62681	0.0188136	-1.00673	1.60429	34	0.373186	0.373186	2.46037
9.7	9.85088	0.118849	-2.31351	6.4864	34	-0.150882	0.286071	2.26516
9.7	9.86593	0.33222	-1.9971	6.33969	34	-0.165926	0.413937	2.26516
9.6	9.73598	0.489367	-2.27864	7.87696	34	-0.135982	0.480052	2.20008
9.8	9.50453	0.65585	-2.5652	10.2885	34	0.295468	0.511565	2.33023
9.8	9.39048	0.0642973	0.847211	1.86465	42	0.409524	0.438095	2.33023
10.7	9.40238	0.220238	1.20186	3.6003	42	1.29762	1.3119	2.91586
10.4	9.25	0.333293	1.24259	2.83574	42	1.15	1.20714	2.72065
10.1	9.1	0.481463	2.17925	7.59317	42	1	1.13333	2.52544
9.5	8.9381	0.580465	1.86198	6.41002	42	0.561905	0.785714	2.13501
9.5	8.98485	0.0819508	1.22559	3.78061	33	0.515152	0.545455	2.13501
9.8	9.07273	0.168295	-0.0172025	0.951749	33	0.727273	0.751515	2.33023
10.7	8.88182	0.421534	0.774266	1.97542	33	1.81818	1.83636	2.91586
10.4	8.70909	0.577727	0.469293	1.7176	33	1.69091	1.72727	2.72065
10.4	7.9619	0.339001	0.28529	-0.495795	42	2.4381	2.4381	2.72065
8.8	8.08605	0.0602769	-0.711914	1.01962	43	0.713953	0.713953	1.67952
9.5	8.34884	0.119225	-0.93028	1.45805	43	1.15116	1.15116	2.13501
9.8	8.30233	0.197375	-0.427964	-0.316651	43	1.49767	1.49767	2.33023
10.7	8.15116	0.296844	0.182288	-0.0363607	43	2.54884	2.54884	2.91586
9.5	10.1641	0.0181511	1.5209	5.24698	39	-0.664103	0.664103	2.13501
8.4	9.92051	0.0564103	1.65576	6.63623	39	-1.52051	1.52051	1.41924
7.8	9.73846	0.0834818	2.06393	8.89658	39	-1.93846	1.93846	1.02881
7.5	9.53684	0.115903	1.56609	6.00057	38	-2.03684	2.03684	0.833603
7.5	9.31579	0.14569	1.27255	3.60352	38	-1.81579	1.81579	0.833603
10.1	8.55862	0.797512	1.77169	7.5174	29	1.54138	1.67241	2.52544
9.5	7.28788	0.0998485	-0.0524587	-0.638058	33	2.21212	2.21212	2.13501
5.5	5.00262	0.00863688	0.846782	2.10364	49	0.49738	0.49738	-0.467809
6.1	5.15762	0.0325969	-0.230322	0.463182	49	0.942384	0.942384	-0.0773855
6.8	5.25759	0.0695876	0.193702	0.723404	49	1.54241	1.54241	0.378109
8.1	5.28946	0.11402	0.424924	0.548253	49	2.81054	2.81054	1.22403
9.7	9.04245	0.0431627	-1.17767	1.6334	50	0.657551	0.657551	2.26516
10	9.5203	0.128054	-1.09452	3.58219	50	0.479695	0.498908	2.46037
9.7	9.73089	0.229788	-1.39973	4.71423	50	-0.030891	0.337927	2.26516
7.6	7.58571	0.0230252	0.523673	0.812776	35	0.0142857	0.111429	0.898673
7.2	7.68857	0.0675126	0.175609	-0.351267	35	-0.488571	0.488571	0.638391
8.3	7.65714	0.192521	2.16744	8.22482	35	0.642857	0.711429	1.35417
8.8	7.46857	0.107513	0.0572884	-0.972622	35	1.33143	1.33143	1.67952
9.7	9.75483	0.436606	-1.66546	4.52856	49	-0.054826	0.451054	2.26516
9.6	9.63063	0.644006	-1.58277	4.15562	49	-0.0306322	0.524906	2.20008
9.4	5.2316	0.126259	0.652036	1.20188	43	4.1684	4.1684	2.06994
6.1	5.15156	0.00820022	0.182077	-0.431237	49	0.948445	0.948445	-0.0773855
6.8	5.34021	0.025075	-0.210467	-0.810305	49	1.45979	1.45979	0.378109
8.1	5.45262	0.0622566	-0.154057	-0.813942	49	2.64738	2.64738	1.22403
9.7	5.47758	0.189391	-0.497992	0.793659	45	4.22242	4.22242	2.26516
9.4	5.49065	0.10185	-0.0507401	-0.799656	47	3.90935	3.90935	2.06994
8.1	6.60851	0.0341529	2.02773	9.9797	51	1.49149	1.49149	1.22403
9.4	7.0731	0.0876906	1.14602	1.66707	51	2.3269	2.3269	2.06994
9.7	7.3931	0.106608	0.501299	0.209772	51	2.3069	2.3069	2.26516
10	7.54946	0.212131	-1.49265	7.15704	51	2.45054	2.45054	2.46037
9.7	7.61132	0.333233	-1.72858	7.60172	51	2.08868	2.08868	2.26516
7.2	7.40513	0.0157625	0.823892	1.9453	39	-0.205128	0.205128	0.638391
8.3	7.44359	0.0304184	-0.0595312	-0.302157	39	0.85641	0.85641	1.35417
8.8	7.3	0.0457895	0.645455	0.213913	39	1.5	1.5	1.67952
9.5	7.18974	0.0946289	1.23941	2.91651	39	2.31026	2.31026	2.13501
9.8	7.07105	0.152383	0.92061	2.4358	38	2.72895	2.72895	2.33023
9.4	7.76489	0.0629566	1.81755	9.43531	43	1.63511	1.63511	2.06994
9.7	8.32699	0.0986039	0.0194421	0.697585	43	1.37301	1.37301	2.26516
10	8.69222	0.214405	-0.62815	2.55821	43	1.30778	1.30778	2.46037
9.7	8.87513	0.385314	-0.502121	3.40211	43	0.824866	0.890906	2.26516
9.7	8.89294	0.624657	-0.651826	1.87494	40	0.807063	0.90333	2.26516
6.8	5.65363	0.0236638	-1.63624	3.04719	47	1.14637	1.14637	0.378109
8.1	5.79995	0.0624683	-1.19147	3.29112	47	2.30005	2.30005	1.22403
9.4	5.92345	0.111006	-1.16918	2.8061	47	3.47655	3.47655	2.06994
9.7	5.96446	0.209016	-0.918019	1.28991	47	3.73554	3.73554	2.26516
10	5.95612	0.261347	-0.733533	0.60627	46	4.04388	4.04388	2.46037
